# Supplementary material
Source: MDPI journal article supplement (https://www.mdpi.com/2571-550X/6/2/25)
Supplement: s1 [file s1]

### Supplementary Information

List of paleolithic sites plotted in fig. 13 (a). This data is collected from Murty (1979), Mishra (2013), and Chauhan (2020).

| Techno-complex    | Site                | Age (ka) |
|-------------------|---------------------|----------|
| Upper Paleolithic | Asla                | 10.03    |
|                   | Belan Valley        | 19.16    |
|                   | Bhedaghat           | 25.16    |
|                   | Chadrasaal I        | 25.16    |
|                   | Chadrasaal II       | 38.9     |
|                   | Deoghat I           | 19.17    |
|                   | Deoghat II          | 25.79    |
|                   | Dharampuri          | 25.16    |
|                   | Gargaon             | 10.31    |
|                   | Inamgaon I          | 21.11    |
|                   | Inamgaon II         | 19.29    |
|                   | Inamgaon III        | 11.7     |
|                   | Kurnool             | 17.39    |
|                   | Mehgara I           | 14.14    |
|                   | Mehgara II          | 11.2     |
|                   | Mehgara III         | 10.03    |
|                   | Nagda               | 31       |
|                   | Nandipalle          | 24.36    |
|                   | Nevasa I            | 12.85    |
|                   | Nevasa II           | 16.42    |
|                   | Patne               | 30       |
|                   | Ramnagar            | 31       |
|                   | Rampur I            | 11.87    |
|                   | Rampur II           | 11.87    |
|                   | Rampur III          | 26.25    |
|                   | Sangamner I         | 12.89    |
|                   | Sangamner II        | 24.67    |
|                   | Site 55             | 45       |
| Microlithic       | Akbarpur            | 12.39    |
|                   | Batadombe Lena      | 36       |
|                   | Budha Pushkar (E-G) | 27       |
|                   | Budha Pushkar (A-D) | 16       |
|                   | Dhaba II Layer-E    | 48       |
|                   | Dhaba II Layer-C    | 37       |
|                   | Dhaba III Layer-F   | 26       |
|                   | Dharmapuri          | 25.16    |

|                       |                     |       |
|-----------------------|---------------------|-------|
|                       | Fa-Hien Lena        | 48    |
|                       | Kana                | 42    |
|                       | Karondia I          | 16.97 |
|                       | Karondia II         | 3.8   |
|                       | Kasrawad I          | 3.9   |
|                       | Kasrawad II         | 3.8   |
|                       | Khapadkheda         | 15.68 |
|                       | Kitulgala Beli-Lena | 45    |
|                       | Mahadebbara         | 34    |
|                       | Mehtakheri Sec. I   | 48    |
|                       | Mehtakheri Sec. II  | 32    |
|                       | Navdatoli I         | 4.12  |
|                       | Navdatoli II        | 3.2   |
|                       | Nawarkheda          | 24.11 |
|                       |                     |       |
| Middle<br>Paleolithic | Dhaba I             | 78    |
|                       | Dhaba II            | 70    |
|                       | Dhaba III           | 65    |
|                       | Jwalapuram 3        | 77    |
|                       | Jwalapuram 21       | 71    |
|                       | Jwalapuram 22       | 38    |
|                       | Kalpi               | 45    |
|                       | Sanghao Cave        | 42    |
|                       | Arjun 3             | 30    |
|                       | Jetpur              | 53    |
|                       | Sandhav             | 114   |
|                       | Kataoti             | 95    |
